# Supplementary material
Source: bioRxiv or medRxiv preprint supplement (https://www.biorxiv.org/highwire/filestream/137391/field_highwire_adjunct_files/3/361105-4.pdf)
Supplement: Supplementary file [file 361105-4.pdf]

**Lateral Crest**

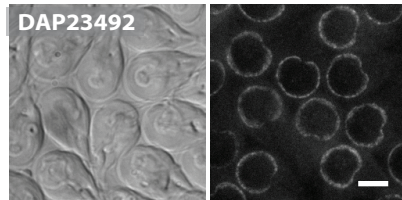

ankyrin repeat

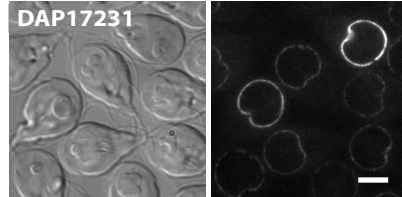

Nek kinase

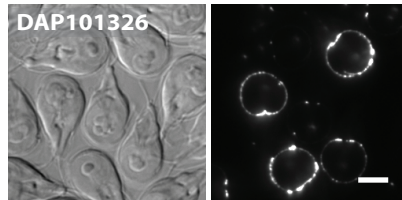

novel

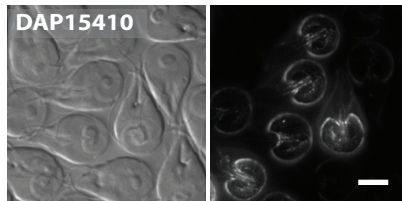

Ser/Thr kinase

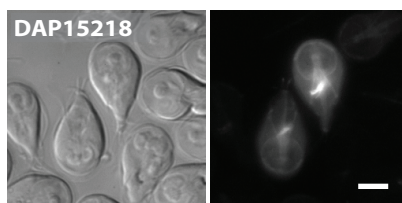

WD-40 repeat

**Body/Ventral Groove/  
Lateral Crest**

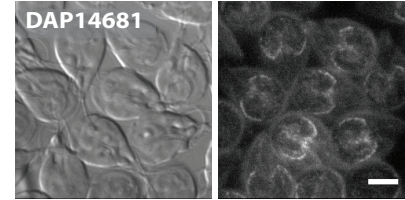

ankyrin repeat

**Disc Margin/Dense Bands**

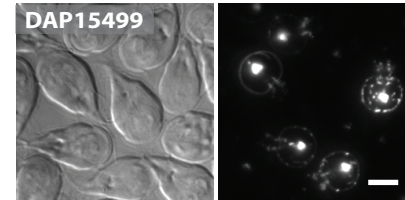

novel

**Body/Overlap Zone/  
Dense Bands**

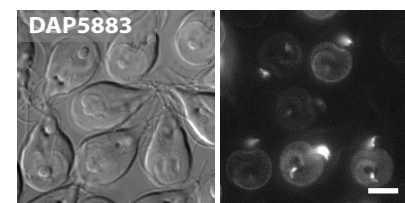

ankyrin repeat

**Body/Overlap Zone/  
Disc Margin/Dense Bands**

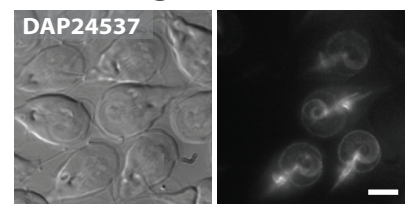

novel

**Dense Bands**

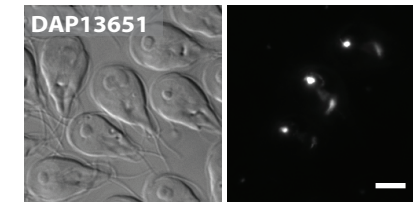

novel

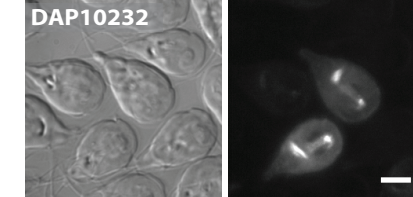

novel

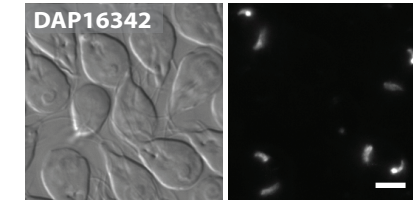

novel

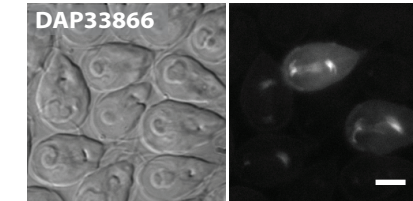

novel
